# Supplementary material
Source: publisher figshare collection journal article supplement (https://springernature.figshare.com/ndownloader/files/25852135)
Supplement: Supplementary file [file 25852135]

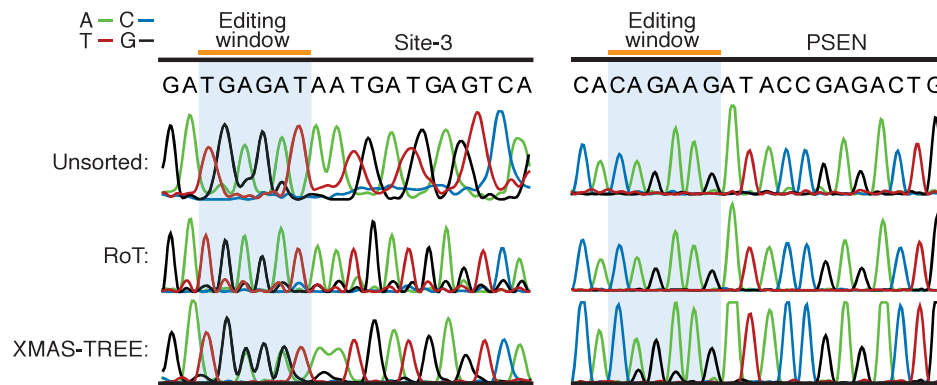

**Supplemental Figure 14. Representative Sanger sequencing chromatographs of edited hPSCs enriched using XMAS-TREE and RoT-based approaches.** Sanger sequencing chromatographs of Site-3 and PSEN1 of unsorted hPSCs as well as mCherry-positive and mCherry-positive/GFP-positive cells isolated using RoT-based and XMAS-TREE strategies, respectively.
